# Supplementary material for: Highly heteroselective ring-opening polymerization of rac-lactide initiated by rare-earth alkoxides bearing chiral [NNOO]-type amine-bis(phenolate) ligands
Source: Royal Society of Chemistry journal article supplement (doi:10.1039/d2py00455k), 2022-01-01
Supplement: d2py00455k1.pdf [file d2py00455k1.pdf]

## Supporting Information

### Highly heteroselective ring-opening polymerization of *rac*-lactide initiated by rare-earth alkoxides bearing chiral [NNOO]-type amine-bis(phenolate) ligands

Yu-Lai Duan<sup>a,\*</sup>, Qian Guo<sup>b</sup>, Gui-Yang Liu<sup>a</sup>, Zhong-Zhou Yi<sup>a</sup>, Shao-Ping Feng<sup>a</sup> and Yong Huang<sup>b,\*</sup>

<sup>a</sup> Local Characteristic Resource Utilization and New Materials Key Laboratory of Universities in Yunnan, School of Chemistry and Resources Engineering, Honghe University, Mengzi, 661199, Yunnan, P. R. China

<sup>b</sup> Key Laboratory of Nonferrous Metals Chemistry and Resources Utilization of Gansu Province, College of Chemistry and Chemical Engineering, Lanzhou University, Lanzhou 730000, Gansu, P. R. China

E-mail: duanyl12@lzu.edu.cn; huangyong@lzu.edu.cn.

|                                                                                                                                                     |     |
|-----------------------------------------------------------------------------------------------------------------------------------------------------|-----|
| 1. Fig. S1. <sup>1</sup> H NMR spectrum of ligand ( <i>S</i> )-L <sup>1</sup> -H <sub>2</sub> in CDCl <sub>3</sub> at 298 K.....                    | S2  |
| 2. Fig. S2. <sup>13</sup> C NMR spectrum of ligand ( <i>S</i> )-L <sup>1</sup> -H <sub>2</sub> in CDCl <sub>3</sub> at 298 K.....                   | S2  |
| 3. Fig. S3. <sup>1</sup> H NMR spectrum of ligand ( <i>S</i> )-L <sup>2</sup> -H <sub>2</sub> in CDCl <sub>3</sub> at 298 K.....                    | S3  |
| 4. Fig. S4. <sup>13</sup> C NMR spectrum of ligand ( <i>S</i> )-L <sup>2</sup> -H <sub>2</sub> in CDCl <sub>3</sub> at 298 K.....                   | S3  |
| 5. Fig. S5. <sup>1</sup> H NMR spectrum of ligand ( <i>S</i> )-L <sup>3</sup> -H <sub>2</sub> in CDCl <sub>3</sub> at 298 K.....                    | S4  |
| 6. Fig. S6. <sup>13</sup> C NMR spectrum of ligand ( <i>S</i> )-L <sup>3</sup> -H <sub>2</sub> in CDCl <sub>3</sub> at 298 K.....                   | S4  |
| 7. Fig. S7. <sup>1</sup> H NMR spectrum of ligand ( <i>S</i> )-L <sup>4</sup> -H <sub>2</sub> in CDCl <sub>3</sub> at 298 K.....                    | S5  |
| 8. Fig. S8. <sup>13</sup> C NMR spectrum of ligand ( <i>S</i> )-L <sup>4</sup> -H <sub>2</sub> in CDCl <sub>3</sub> at 298 K.....                   | S5  |
| 9. Fig. S9. <sup>1</sup> H NMR spectrum of complex [L <sup>1</sup> Y(O <sup>i</sup> Pr)(THF)] (1) in C <sub>6</sub> D <sub>6</sub> at 298 K.....    | S6  |
| 10. Fig. S10. <sup>13</sup> C NMR spectrum of complex [L <sup>1</sup> Y(O <sup>i</sup> Pr)(THF)] (1) in C <sub>6</sub> D <sub>6</sub> at 298 K..... | S6  |
| 11. Fig. S11. <sup>1</sup> H NMR spectrum of complex [L <sup>2</sup> Y(O <sup>i</sup> Pr)(THF)] (4) in C <sub>6</sub> D <sub>6</sub> at 298 K.....  | S7  |
| 12. Fig. S12. <sup>13</sup> C NMR spectrum of complex [L <sup>2</sup> Y(O <sup>i</sup> Pr)(THF)] (4) in C <sub>6</sub> D <sub>6</sub> at 298 K..... | S7  |
| 13. Fig. S13. <sup>1</sup> H NMR spectrum of complex [L <sup>3</sup> Y(O <sup>i</sup> Pr)(THF)] (5) in C <sub>6</sub> D <sub>6</sub> at 298 K.....  | S8  |
| 14. Fig. S14. <sup>13</sup> C NMR spectrum of complex [L <sup>3</sup> Y(O <sup>i</sup> Pr)(THF)] (5) in C <sub>6</sub> D <sub>6</sub> at 298 K..... | S8  |
| 15. Fig. S15. <sup>1</sup> H NMR spectrum of complex [L <sup>4</sup> Y(O <sup>i</sup> Pr)(THF)] (6) in C <sub>6</sub> D <sub>6</sub> at 298 K.....  | S9  |
| 16. Fig. S16. <sup>13</sup> C NMR spectrum of complex [L <sup>4</sup> Y(O <sup>i</sup> Pr)(THF)] (6) in C <sub>6</sub> D <sub>6</sub> at 298 K..... | S9  |
| 17. Fig. S17. MALDI-TOF spectrum of oligomer of <i>rac</i> -lactide prepared by complex 1.....                                                      | S10 |

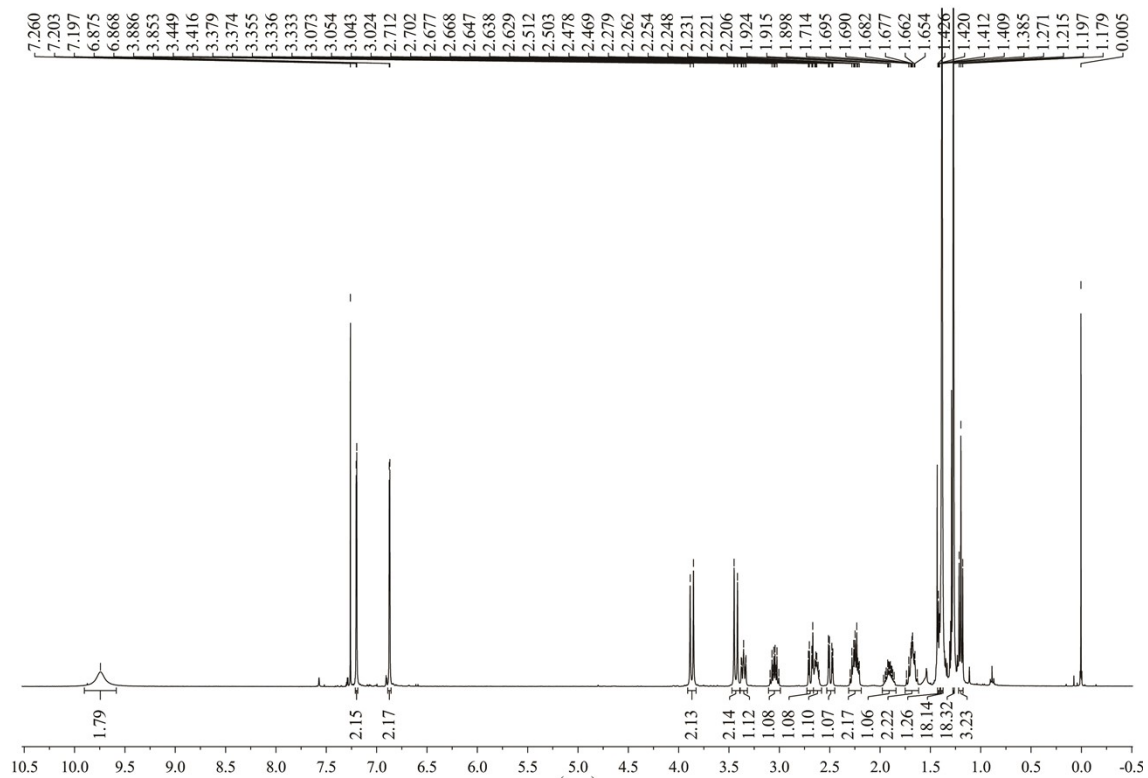

Fig. S1  $^1\text{H}$  NMR spectrum of ligand (*S*)- $\text{L}^1\text{-H}_2$  in  $\text{CDCl}_3$  at 298 K.

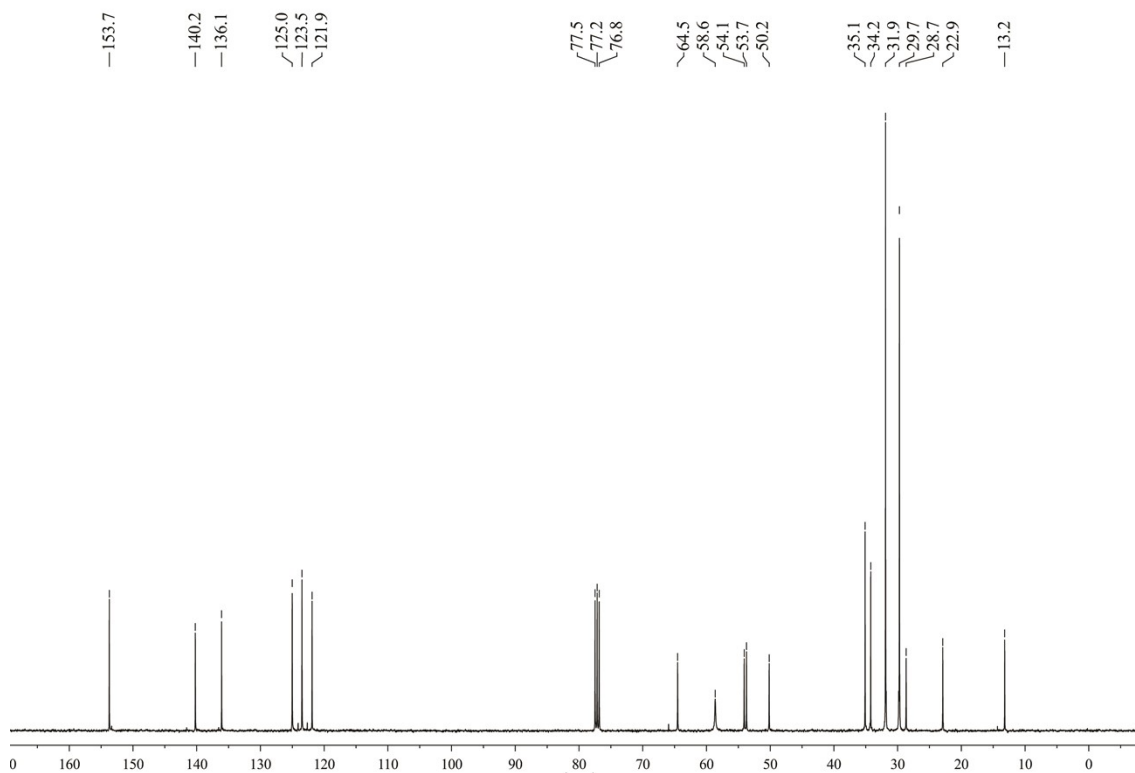

Fig. S2  $^{13}\text{C}$  NMR spectrum of ligand (*S*)- $\text{L}^1\text{-H}_2$  in  $\text{CDCl}_3$  at 298 K.

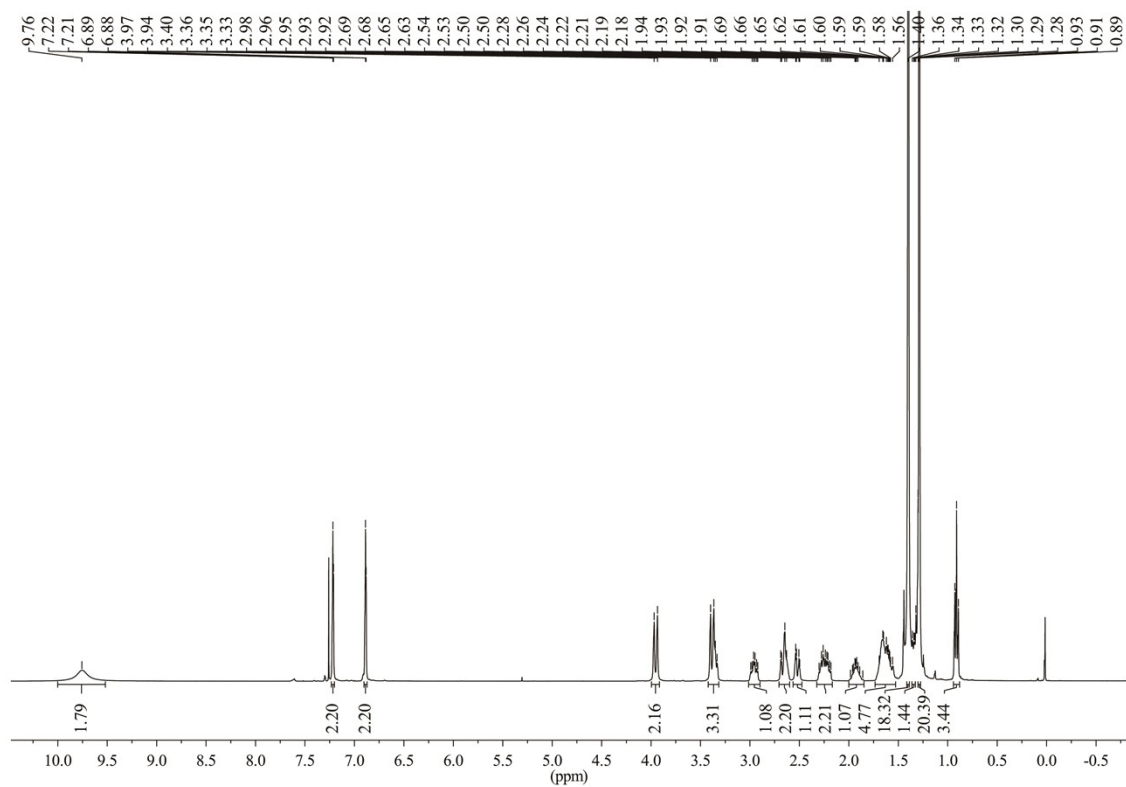

Fig. S3  $^1\text{H}$  NMR spectrum of (*S*)- $\text{L}^2\text{-H}_2$  in  $\text{CDCl}_3$  at 298 K.

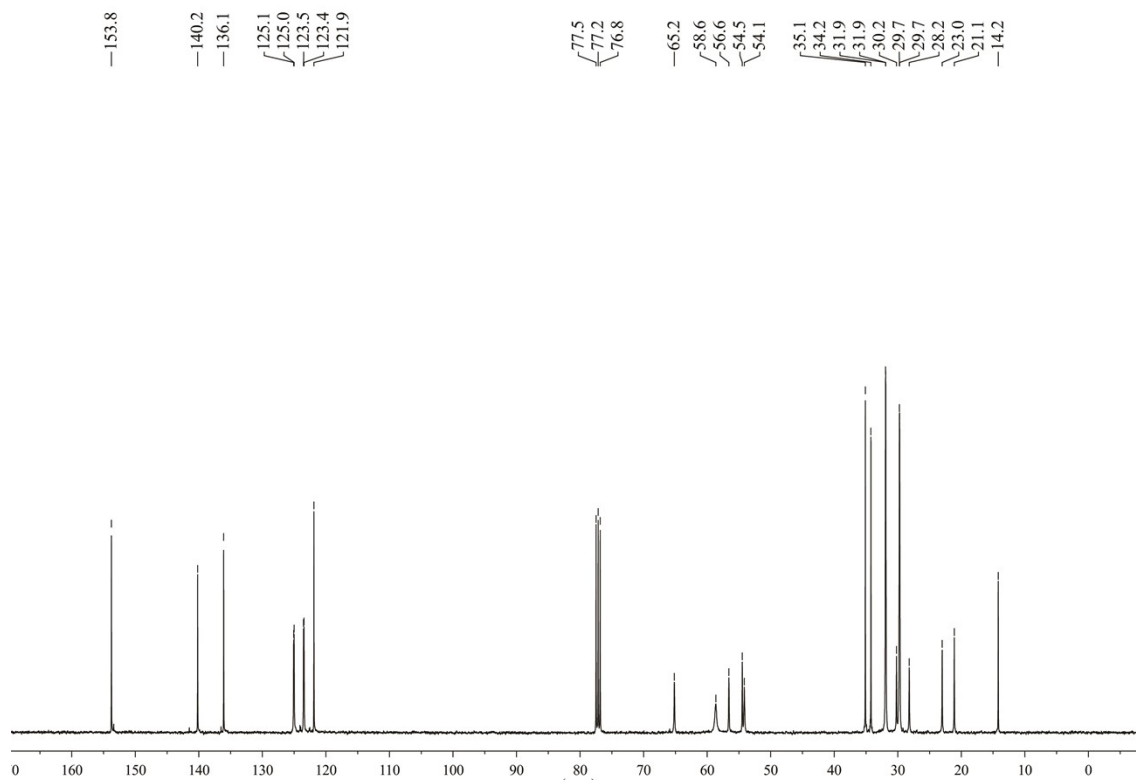

Fig. S4  $^{13}\text{C}$  NMR spectrum of (*S*)- $\text{L}^2\text{-H}_2$  in  $\text{CDCl}_3$  at 298 K.

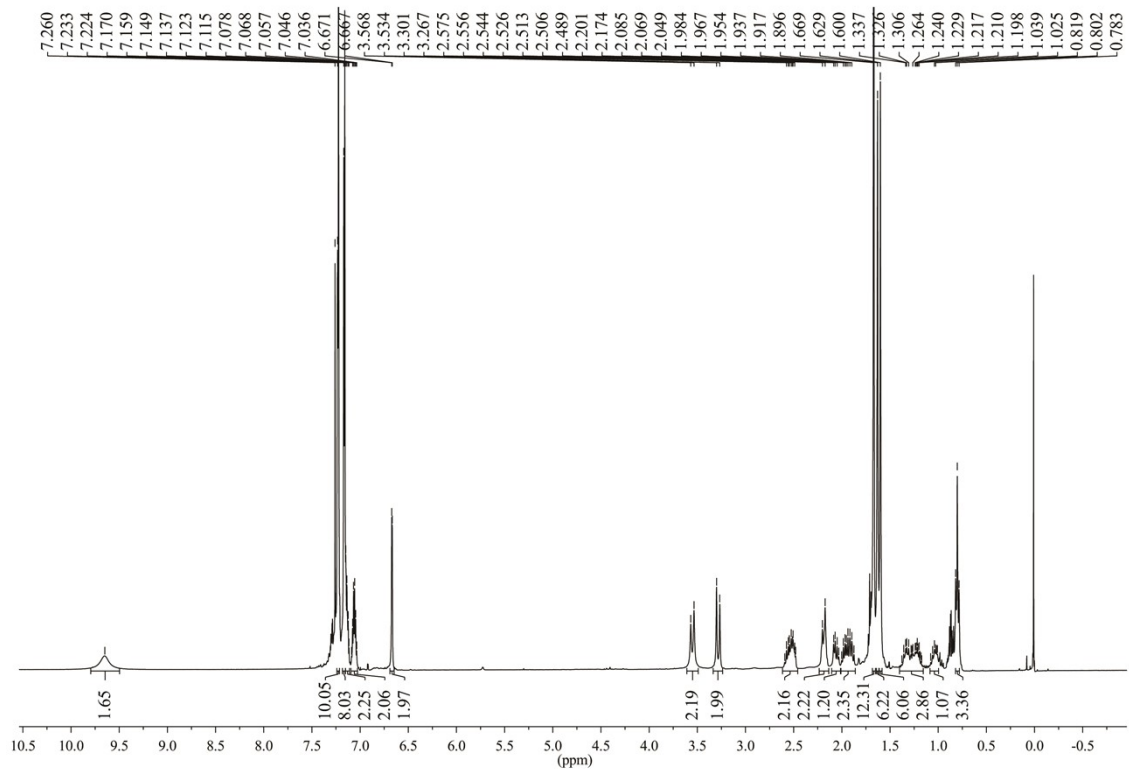

Fig. S5  $^1\text{H}$  NMR spectrum of  $(S)\text{-L}^3\text{-H}_2$  in  $\text{CDCl}_3$  at 298 K.

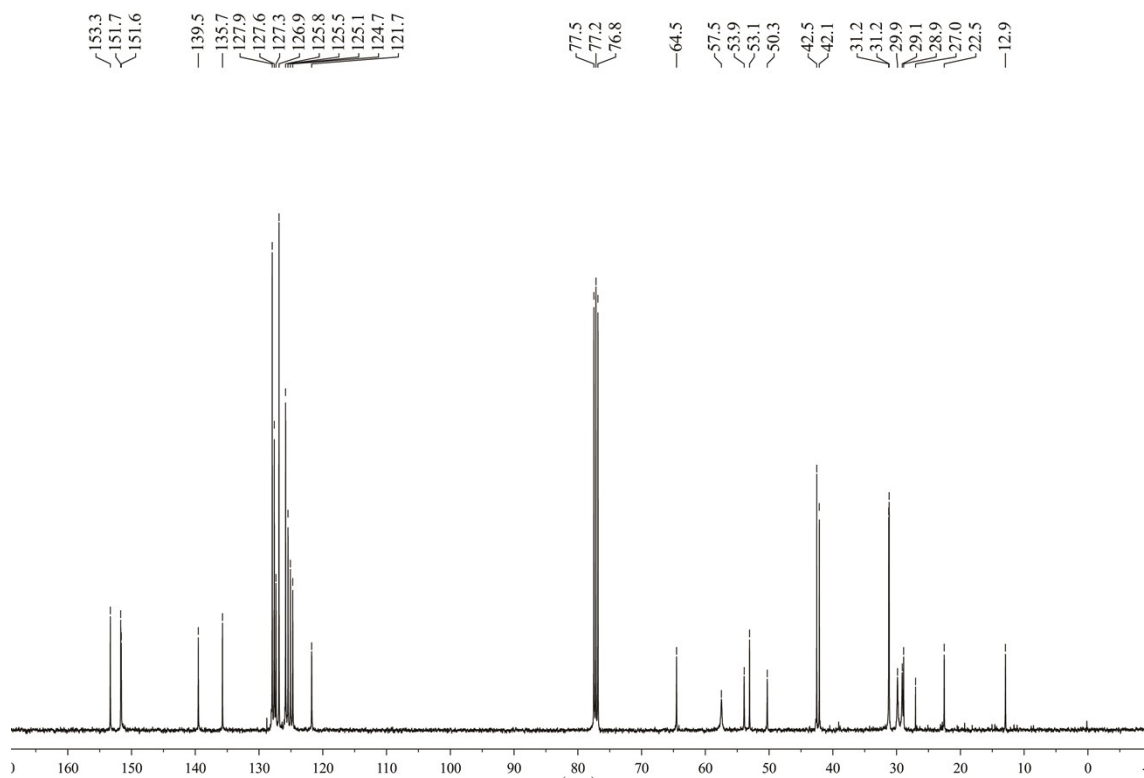

Fig. S6  $^{13}\text{C}$  NMR spectrum of  $(S)\text{-L}^3\text{-H}_2$  in  $\text{CDCl}_3$  at 298 K.

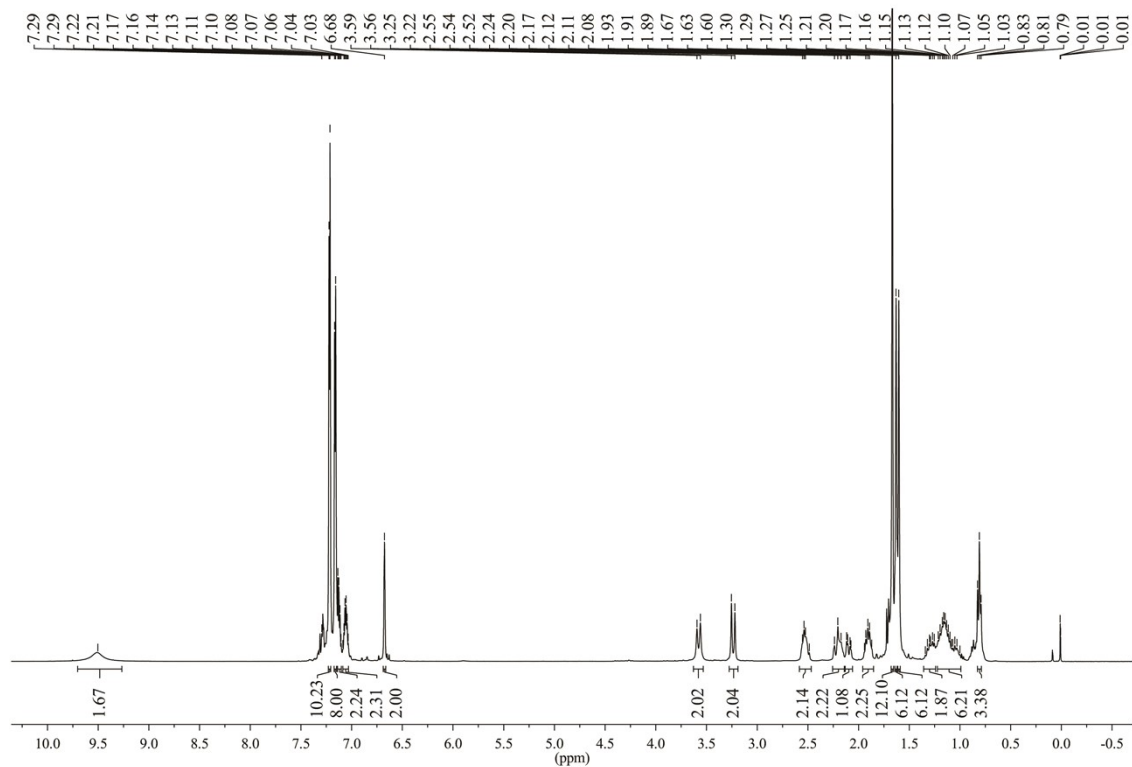

Fig. S7  $^1\text{H}$  NMR spectrum of  $(S)\text{-L}^4\text{-H}_2$  in  $\text{CDCl}_3$  at 298 K.

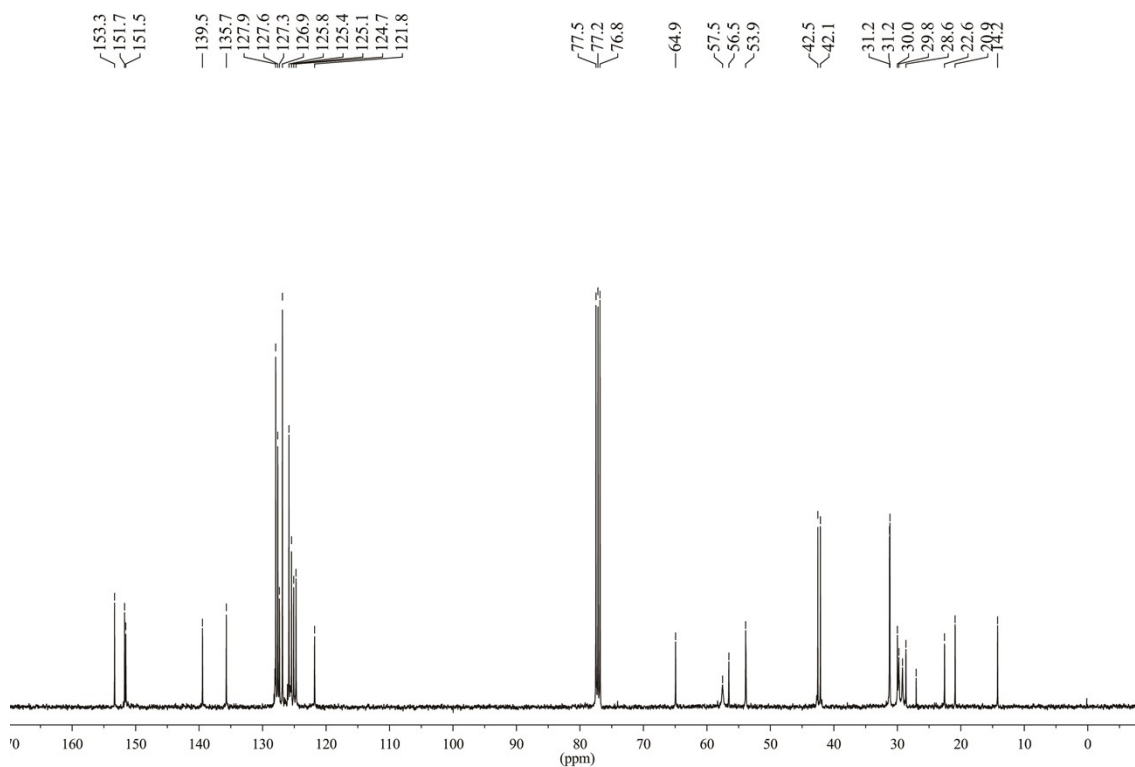

Fig. S8  $^{13}\text{C}$  NMR spectrum of  $(S)\text{-L}^4\text{-H}_2$  in  $\text{CDCl}_3$  at 298 K.

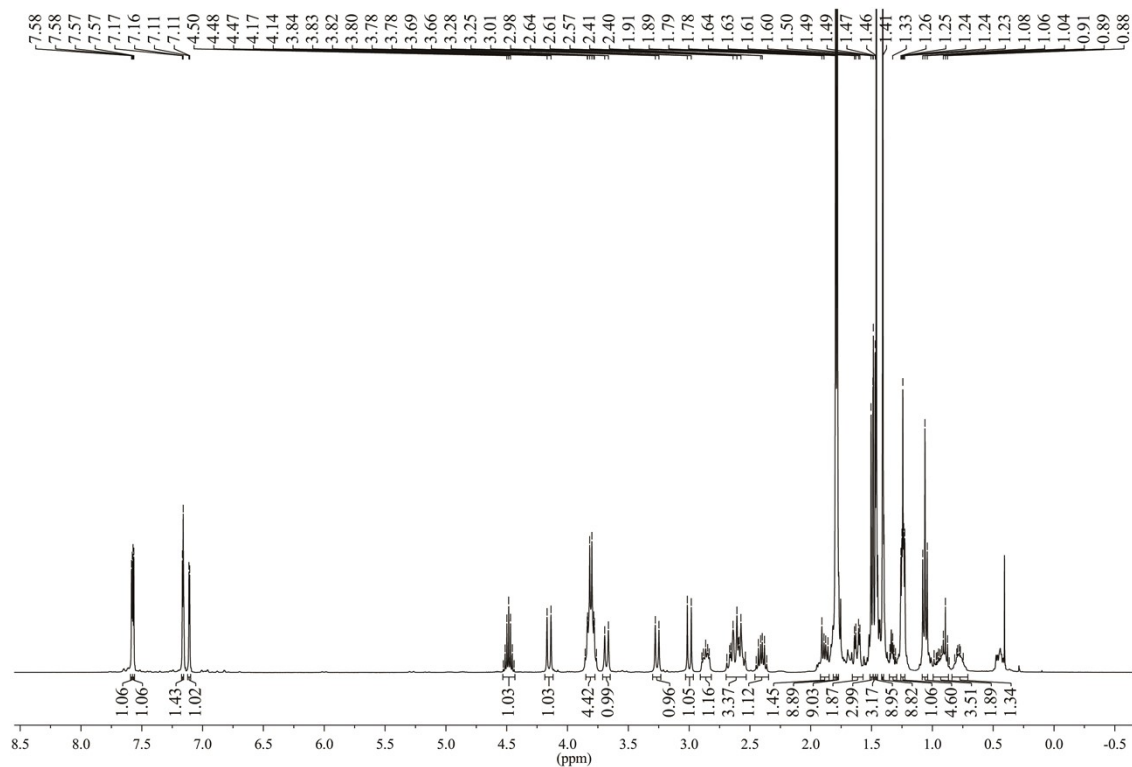

**Fig. S9**  $^1\text{H}$  NMR spectrum of complex  $[\text{L}^1\text{Y}(\text{O}^i\text{Pr})(\text{THF})]$  (**1**) in  $\text{C}_6\text{D}_6$  at 298 K.

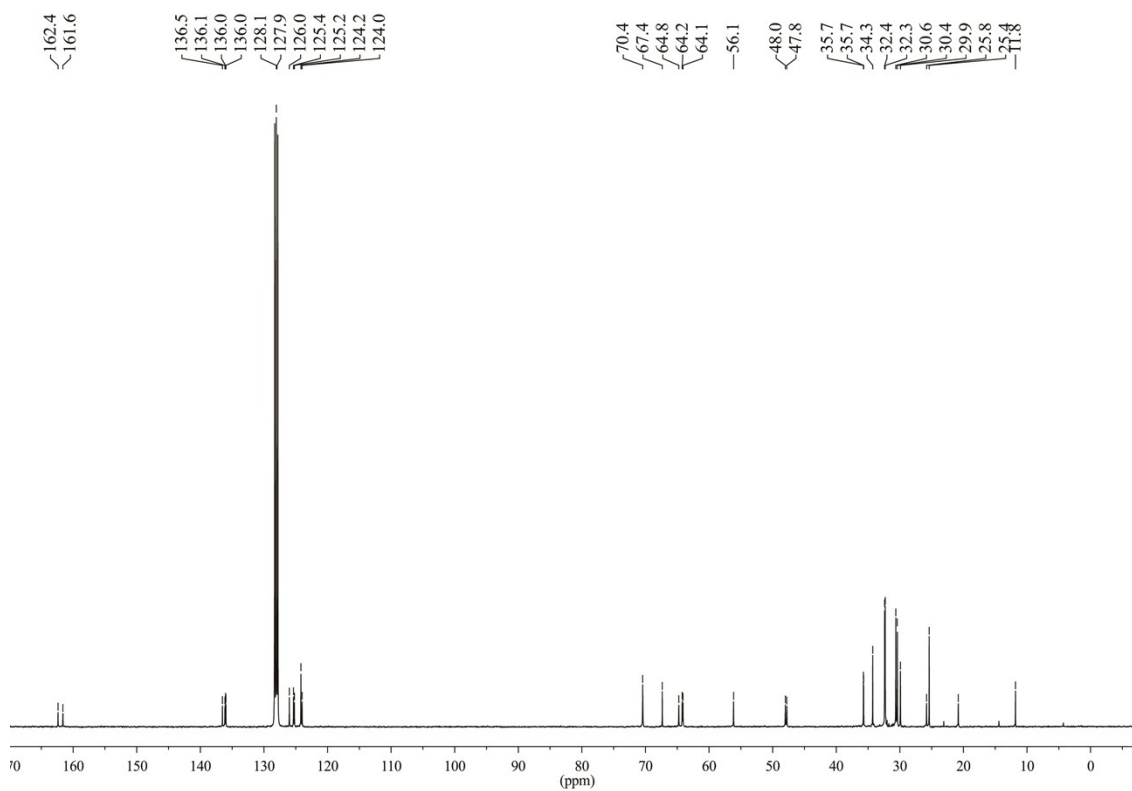

**Fig. S10**  $^{13}\text{C}$  NMR spectrum of complex  $[\text{L}^1\text{Y}(\text{O}^i\text{Pr})(\text{THF})]$  (**1**) in  $\text{C}_6\text{D}_6$  at 298 K.

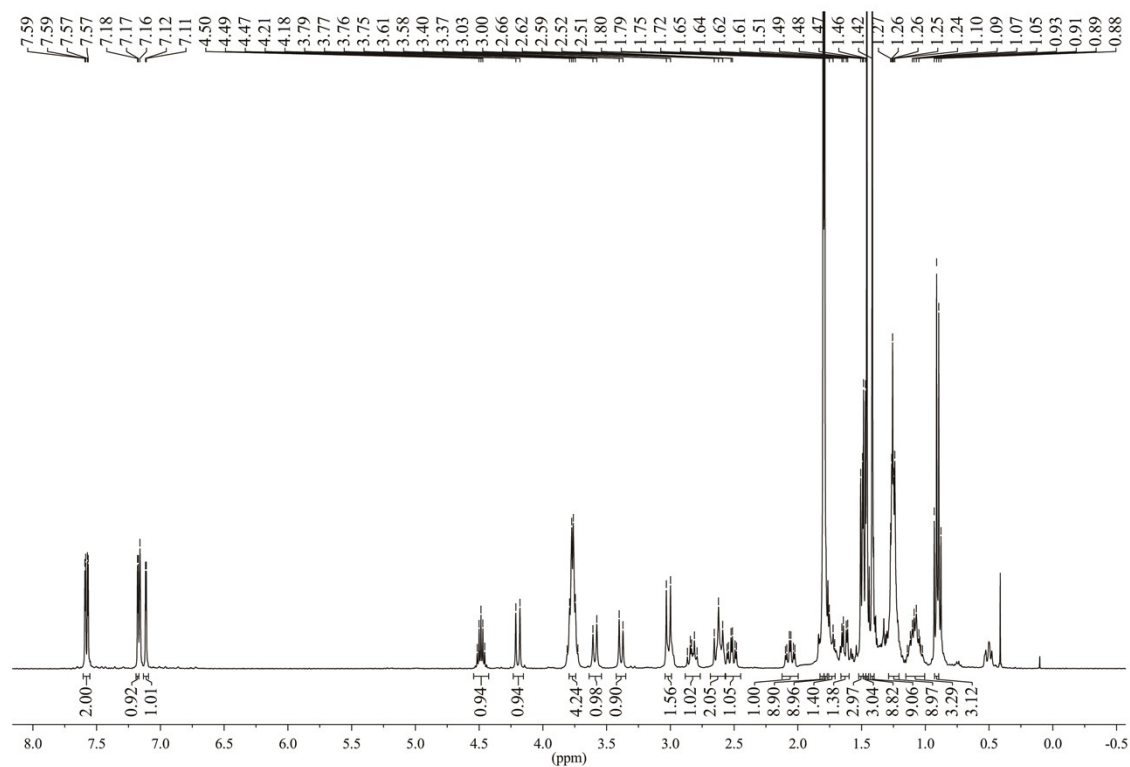

Fig. S11  $^1\text{H}$  NMR spectrum of complex  $[\text{L}^2\text{Y}(\text{O}^i\text{Pr})(\text{THF})]$  (**4**) in  $\text{C}_6\text{D}_6$  at 298 K.

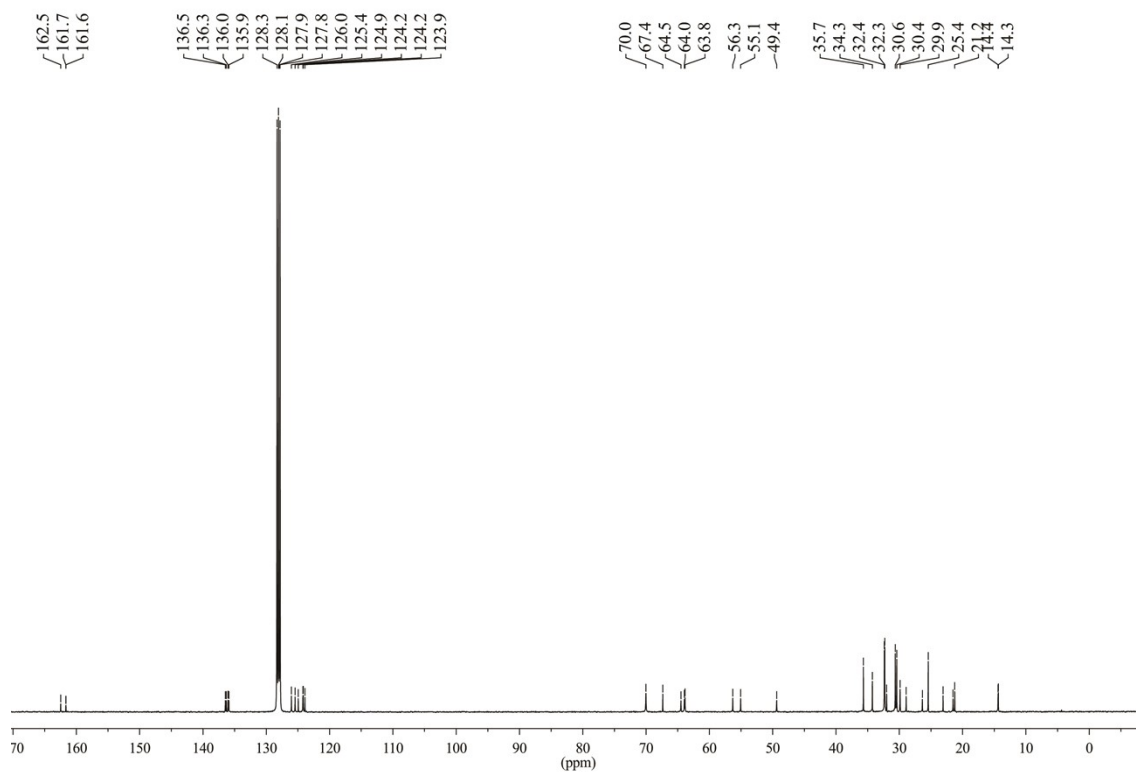

Fig. S12  $^{13}\text{C}$  NMR spectrum of complex  $[\text{L}^2\text{Y}(\text{O}^i\text{Pr})(\text{THF})]$  (**4**) in  $\text{C}_6\text{D}_6$  at 298 K.

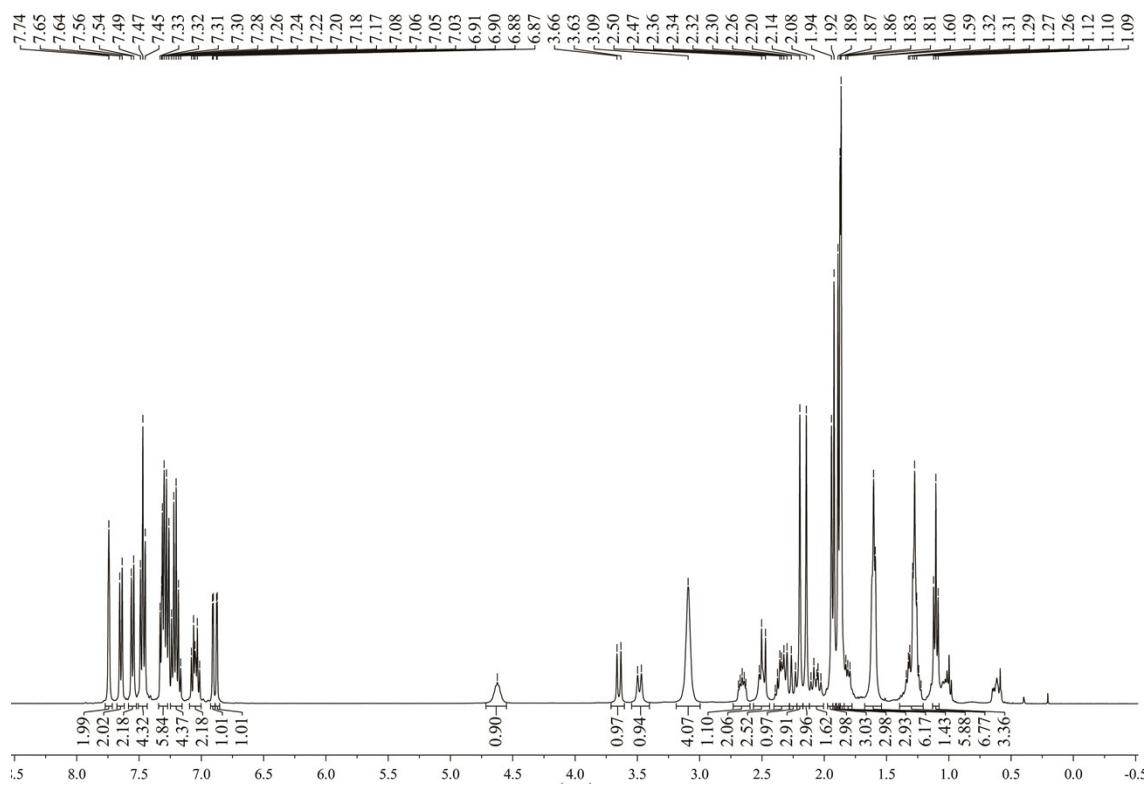

Fig. S13  $^1\text{H}$  NMR spectrum of complex  $[\text{L}^3\text{Y}(\text{O}^i\text{Pr})(\text{THF})]$  (**5**) in  $\text{C}_6\text{D}_6$  at 298 K.

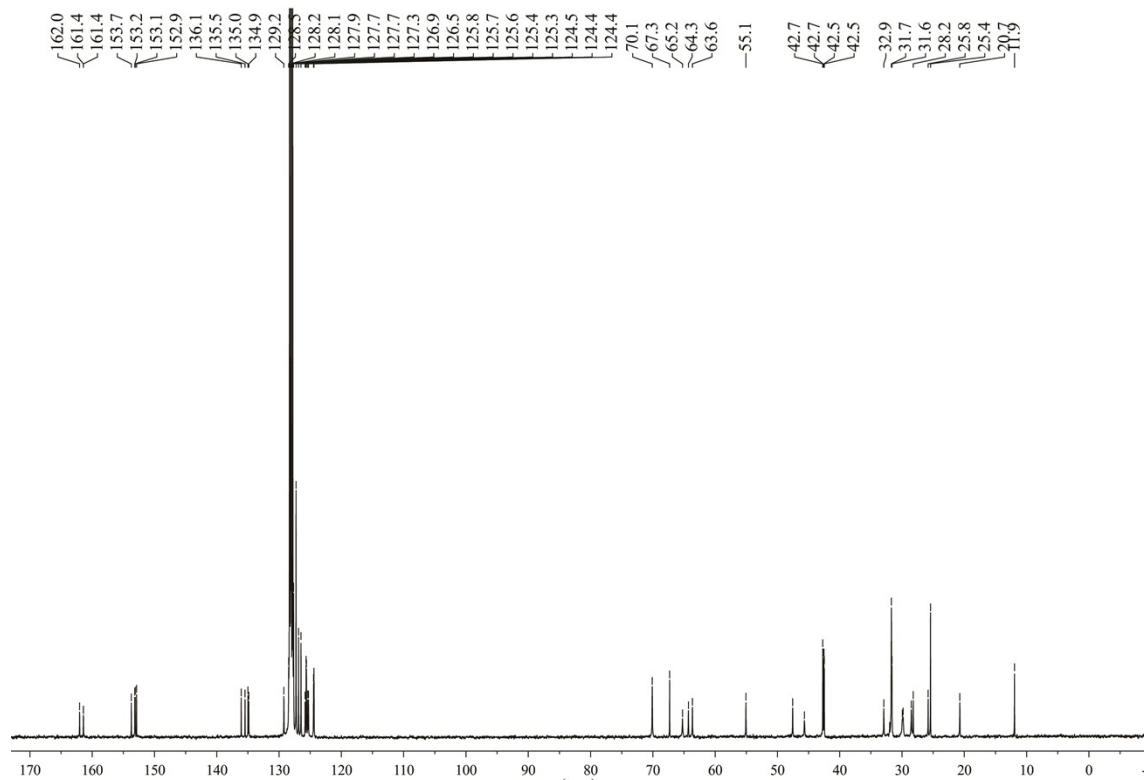

Fig. S14  $^{13}\text{C}$  NMR spectrum of complex  $[\text{L}^3\text{Y}(\text{O}^i\text{Pr})(\text{THF})]$  (**5**) in  $\text{C}_6\text{D}_6$  at 298 K.



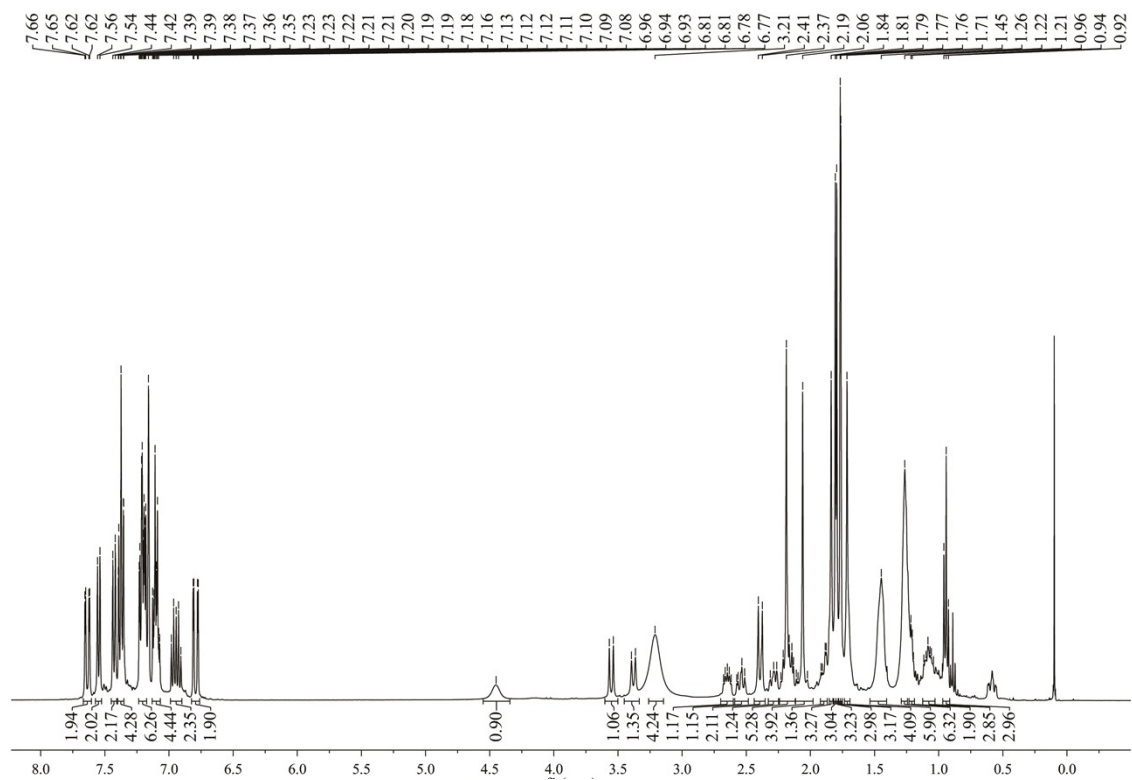

Fig. S15  $^1\text{H}$  NMR spectrum of complex  $[\text{L}^4\text{Y}(\text{O}^i\text{Pr})(\text{THF})]$  (6) in  $\text{C}_6\text{D}_6$  at 298 K.

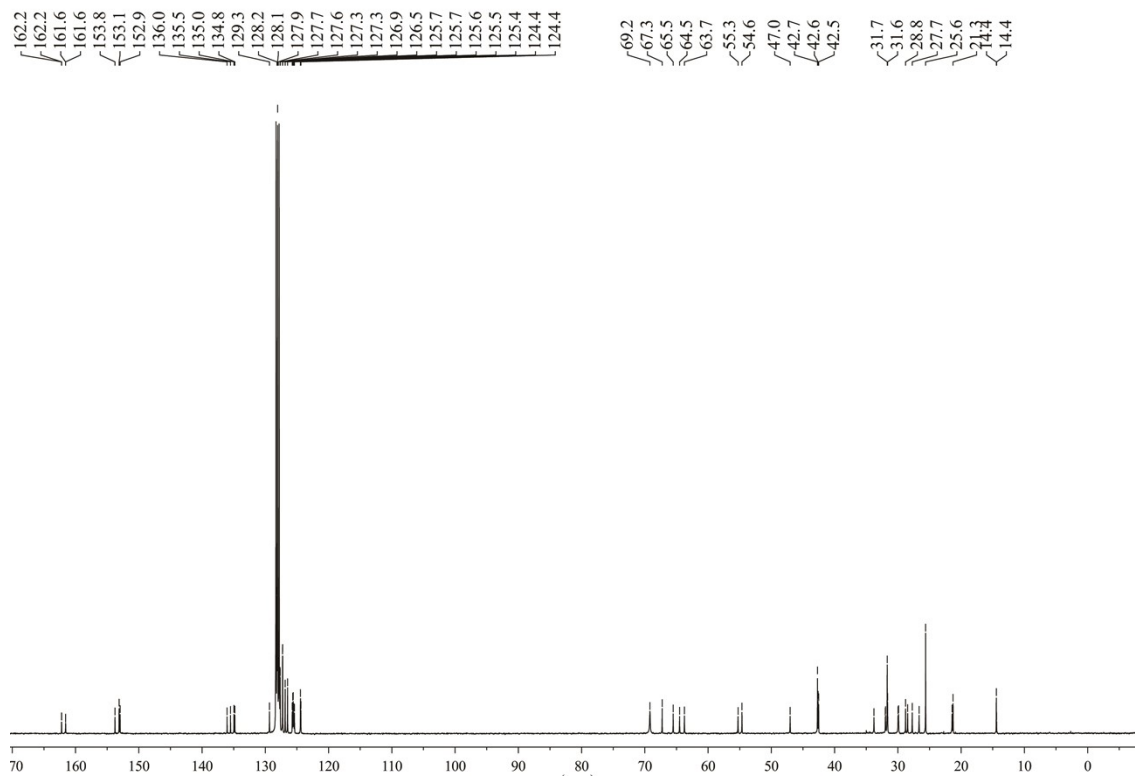

Fig. S16  $^{13}\text{C}$  NMR spectrum of complex  $[\text{L}^4\text{Y}(\text{O}^i\text{Pr})(\text{THF})]$  (6) in  $\text{C}_6\text{D}_6$  at 298 K.

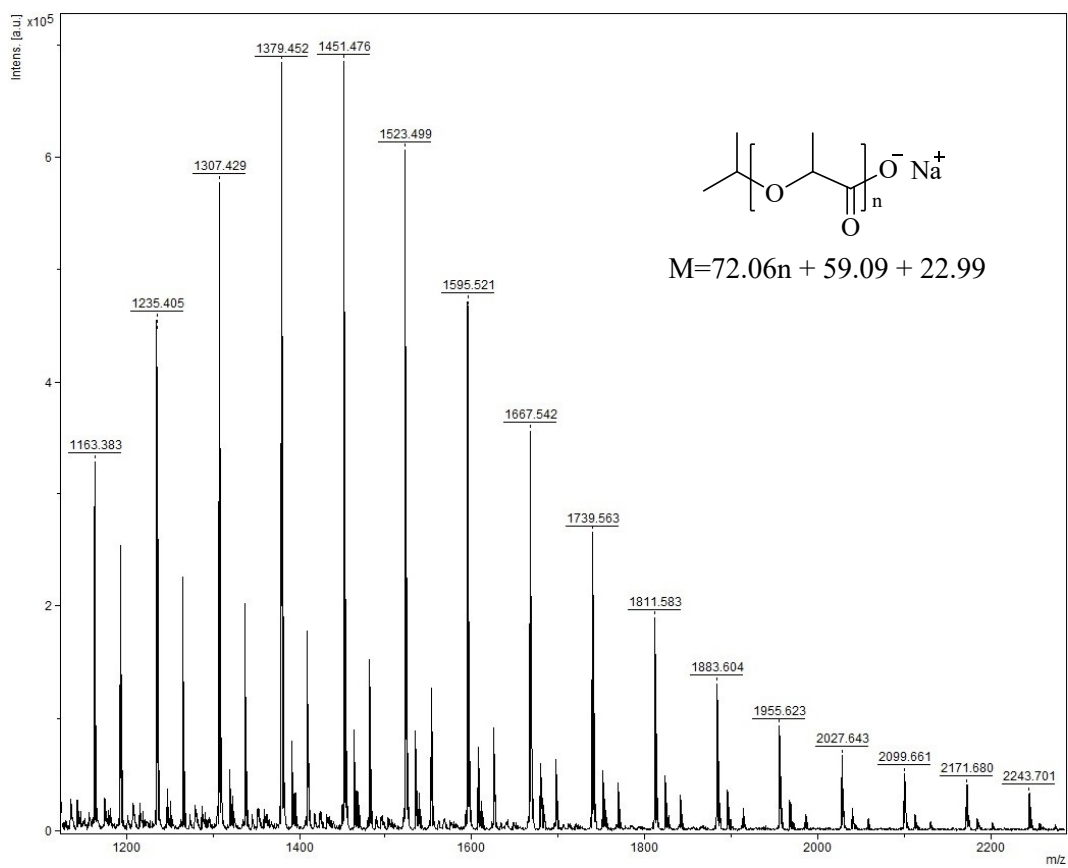

**Fig. S17** MALDI-TOF spectrum of oligomer of *rac*-lactide prepared by complex **1**.
